# Supplementary material for: Thermostable vacuum foam dried Newcastle disease vaccine: Process optimization and pilot-scale study
Source: Springer Nature journal article supplement (doi:10.1007/s00253-024-13174-7), 2024-06-05
Supplement: MOESM1 [file 253_2024_13174_MOESM1_ESM.pdf]

# **Thermostable vacuum foam dried Newcastle disease vaccine: Process optimization and pilot-scale study**

Fang Lyu <sup>1,2,4,5</sup>, Yan-hong Zhao <sup>1,5</sup>, Xiao-xin Zuo <sup>1,6</sup>, Babalwa Nyide <sup>2</sup>, Bi-hua Deng <sup>1,4,5</sup>, Ming-xu Zhou <sup>1, 4</sup>, Jibo Hou <sup>1</sup>, Jia-jie Jiao <sup>1,5</sup>, Min-qian Zeng <sup>1,5</sup>, Hong-ying Jie<sup>1</sup>, Ademola Olaniran <sup>3</sup>, Yu Lu <sup>1,4,5,7\*</sup>, Thandeka Khoza <sup>2\*</sup>

<sup>1</sup> Institute of Veterinary Immunology & Engineering, National Research Center of Engineering and Technology for Veterinary Biologicals, Jiangsu Academy of Agricultural Sciences, Nanjing 210014, China

<sup>2</sup> Department of Biochemistry, School of Life Sciences, College of Agriculture, Engineering & Science, University of KwaZulu-Natal, Pietermaritzburg 3209, South Africa

<sup>3</sup> Department of Microbiology, School of Life Sciences, College of Agriculture, Engineering & Science, University of KwaZulu-Natal, Durban 4000, South Africa

<sup>4</sup> GuoTai (Taizhou) Center of Technology Innovation for Veterinary Biologicals, Taizhou 225300, China

<sup>5</sup> School of Animal Medicine, Nanjing Agricultural University, Nanjing 210095, Jiangsu, China;

<sup>6</sup> Jiangsu Key Laboratory for Food Quality and Safety-State Key Laboratory Cultivation Base, Ministry of Science and Technology, Nanjing 210014, China

<sup>7</sup> School of Pharmacy, Jiangsu University, Zhenjiang, 212013, China

\*Correspondence:

khozat1@ukzn.ac.za; Tel: +27 33 2606281

luyu@jaas.ac.cn (Y. Lu); Tel: +86-25-8439-2088

## Supplementary information

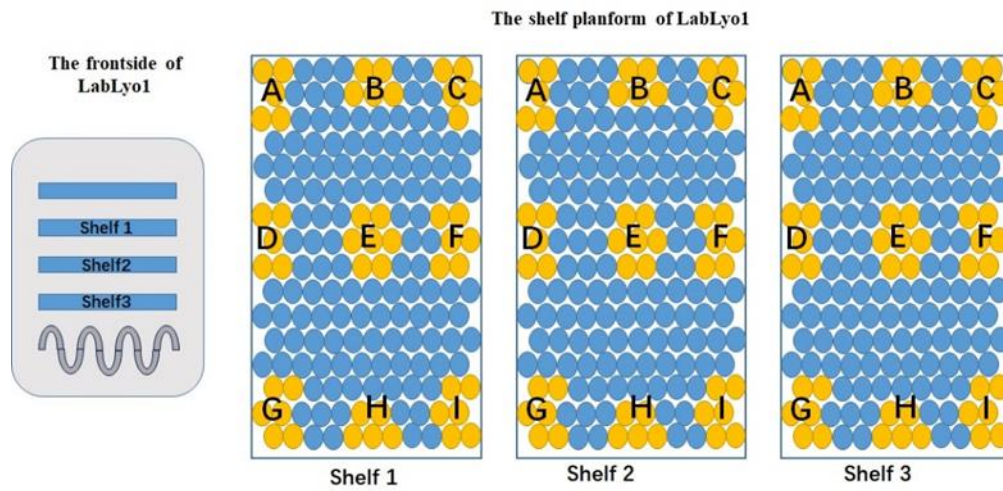

**Figure S1 The sampling design showing different positions of the selected NDV-VFD vaccine samples in the shelves.** There are 3 shelves in the lab lyophilizer (0.27 m<sup>2</sup>). The colors represent the location and position of the samples that were selected for analysis.
